# Supplementary material
Source: MDPI journal article supplement (https://www.mdpi.com/2073-4344/12/11/1399)
Supplement: s1 [file s1 › catalysts-1963348-supplementary.pdf]

# Supplementary Materials

## Preparation of C<sub>3</sub>N<sub>4</sub> thin films for photo-/electrocatalytic CO<sub>2</sub> reduction to produce liquid hydrocarbons

Jin You Zheng <sup>1,\*</sup>, Amol Uttam Pawar <sup>2</sup> and Young Soo Kang <sup>2,\*</sup>

<sup>1</sup> Engineering Research Center of Advanced Functional Material Manufacturing of Ministry of Education, School of Chemical Engineering, Zhengzhou University, Zhengzhou 450001, China

<sup>2</sup> Environmental and Climate Technology, Korea Institute of Energy Technology, Naju-si 58219, Korea

\* Correspondence: jinyouzh@zzu.edu.cn (J.Y.Z); yskang@kentech.ac.kr (Y.S.K);

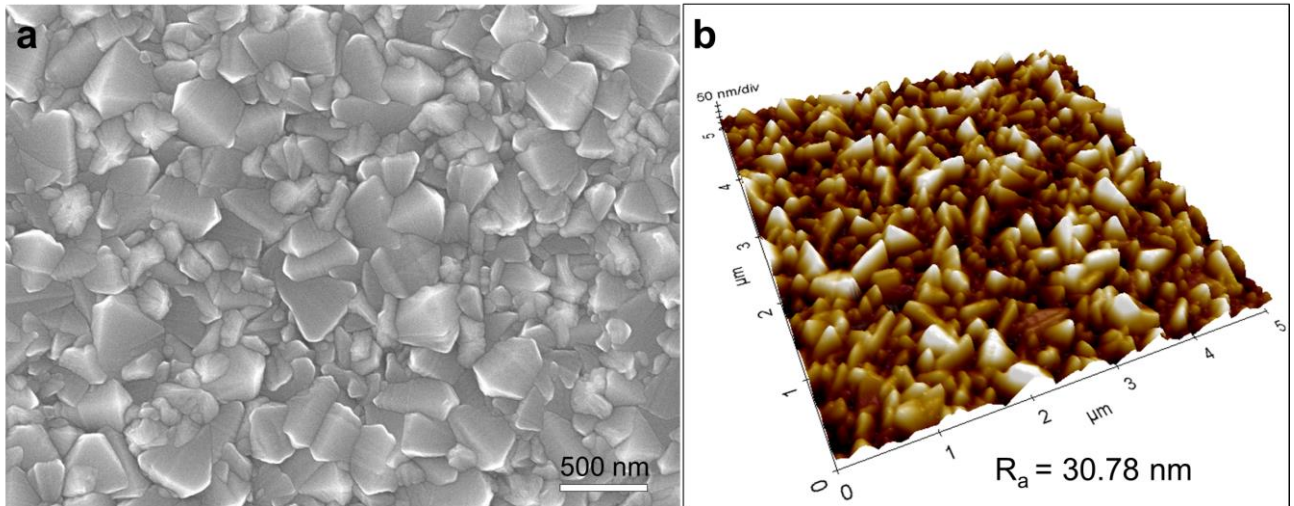

**Figure S1.** (a) SEM and (b) AFM images of the bare FTO glass substrate.

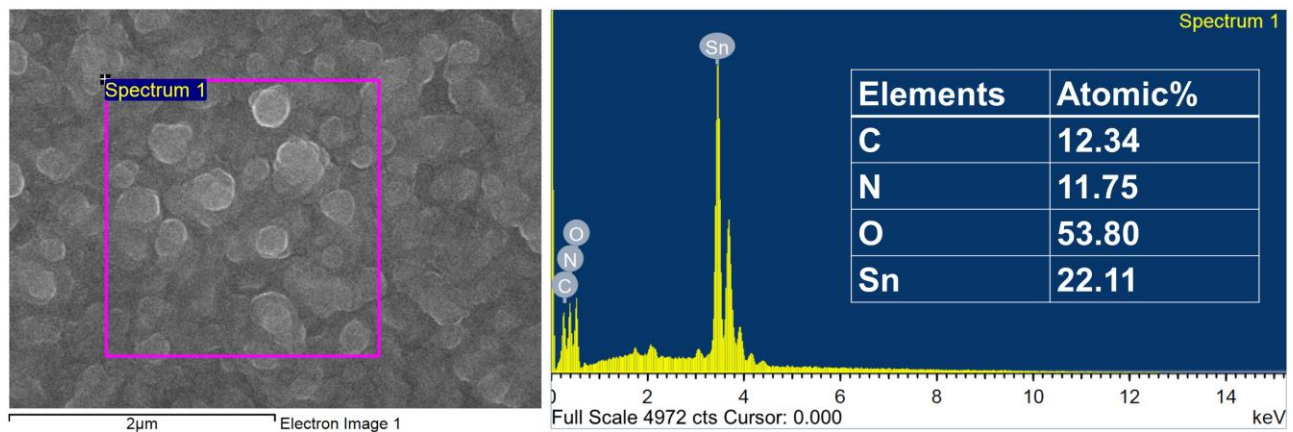

**Figure S2.** SEM-EDS of the CN/FTO-520 film.

## Lifetime subcomponents and average lifetime

Fitting results of PL lifetime decay curves of CN/FTO films derived from  $I(t) = A_1 \exp(-t/\tau_1) + A_2 \exp(-t/\tau_2) + A_3 \exp(-t/\tau_3) + \dots + \sum_i A_i / (A_1 + A_2 + A_3 + \dots) = 1$ . The average lifetime can be defined in two ways.

(1) Intensity-weighted average lifetime:

$$\tau_{av-int} = \sum_{i=1}^3 A_i \tau_i^2 / \sum_{i=1}^3 A_i \tau_i$$

(2) Amplitude-weighted average lifetime:

$$\tau_{av-amp} = \sum_{i=1}^3 A_i \tau_i / \sum_{i=1}^3 A_i$$

where  $\tau_{av-int}$  equals the average amount of time for which the emitter (e.g. fluorophores) remain in their excited state after the onset of excitation.  $\tau_{av-amp}$  is proportional to the steady state intensity.

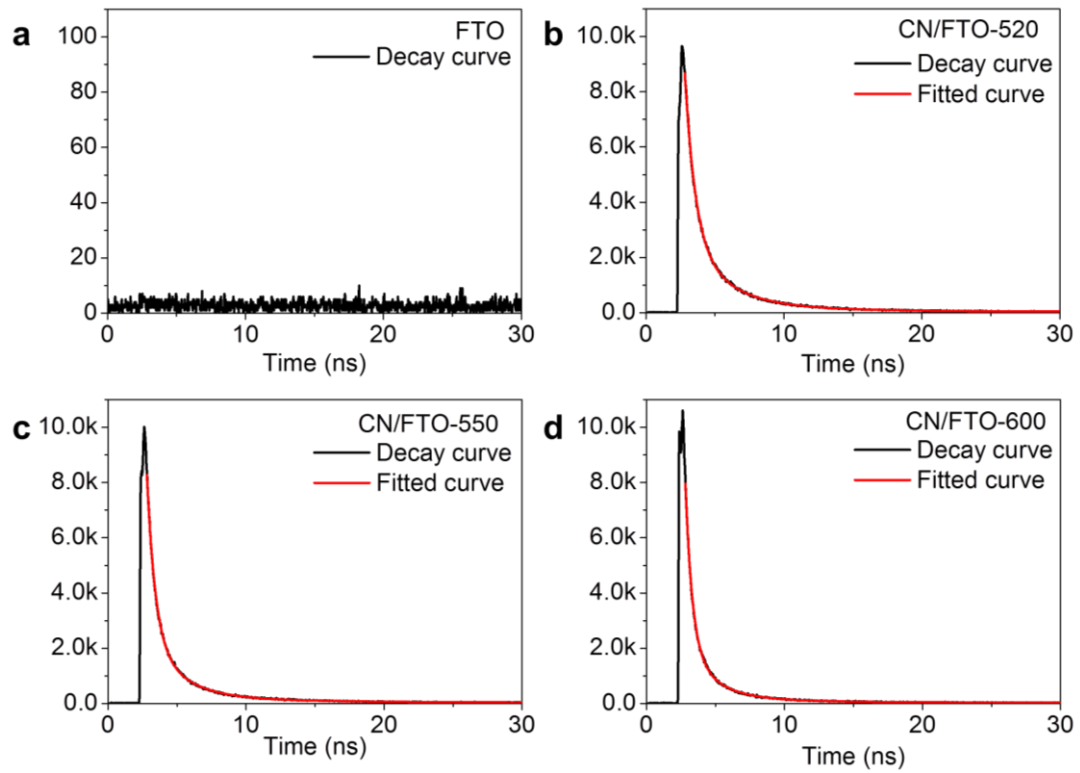

**Figure S3.** PL lifetime decay curves and their fitted curves of different films. (a) FTO, (b) CN/FTO-520, (c) CN/FTO-550, and (d) CN/FTO-600.

**Table S1.** Fitting results of PL lifetime decay curves and their corresponding average lifetime.

| Samples    | $A_1$ | $\tau_1$ (ns) | $A_2$  | $\tau_2$ (ns) | $A_3$ | $\tau_3$ (ns) | $\tau_{av-int}$ (ns) | $\tau_{av-amp}$ (ns) |
|------------|-------|---------------|--------|---------------|-------|---------------|----------------------|----------------------|
| CN/FTO-520 | 2.6   | 2.77          | 0.223  | 12            | 5.96  | 0.748         | 3.9                  | 1.639                |
| CN/FTO-550 | 2.24  | 2.39          | 0.2007 | 12            | 5.98  | 0.601         | 3.82                 | 1.346                |
| CN/FTO-600 | 6.08  | 0.4991        | 0.1463 | 11            | 1.93  | 2.08          | 3.12                 | 1.059                |

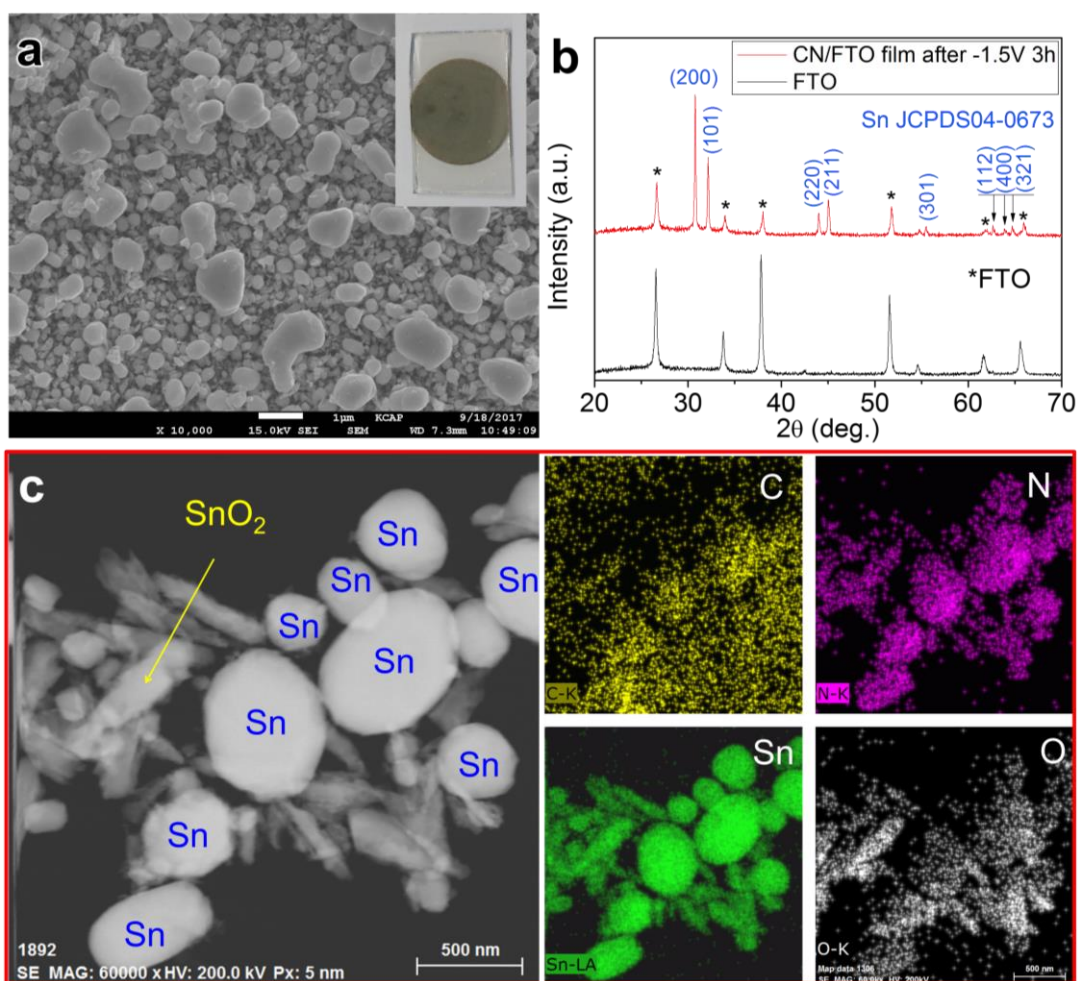

**Figure S4.** (a) SEM images and (b) XRD, (c) STEM-EDS of CN/FTO-520 film after electrochemical CO<sub>2</sub> reduction at -1.5 V vs Ag/AgCl (-0.842 V<sub>RHE</sub>) for 3 h in CO<sub>2</sub>-saturated 0.5 M KHCO<sub>3</sub> aqueous solution. The inset in (a) is the photograph of the film after reduction at -0.842 V<sub>RHE</sub> for 3 h.
